# Supplementary material for: NASCarD (Nanopore Adaptive Sampling with Carrier DNA): A Rapid, PCR-Free Method for SARS-CoV-2 Whole-Genome Sequencing in Clinical Samples
Source: MDPI journal article supplement (doi:10.3390/pathogens13010061), 2024-01-09
Supplement: s1 [file s1]

## **SUPPLEMENTARY MATERIAL**

### **NASCarD (Nanopore Adaptive Sampling with Carrier DNA): A Rapid, PCR-Free Method for SARS-CoV-2 Whole-Genome Sequencing in Clinical Samples**

Miguel A. Terrazos Miani <sup>†</sup>, Loïc Borcard <sup>†</sup>, Sonja Gempeler, Christian Baumann, Pascal Bittel, Stephen L. Leib, Stef-an Neuenschwander and Alban Ramette <sup>\*</sup>

**Figure S1. Detailed read characteristics between NASCarD and a control sequencing run for experiment V. A)** After each run, all reads were systematically mapped to SARS-CoV-2, Lambda phage and human genome sequences. "Enriched" reads mapped exclusively to SARS-CoV-2, yielding 855 reads with an average length of 3,833 bp. The "Rejected" reads corresponded almost entirely to either human DNA (1,324,197 reads) or Lambda DNA (1,128,212 reads) and had a mean length of 548.2 and 548.7, respectively. Moreover, a 371-bp-long read mapped to SARS-CoV-2. Control sequencing reads were mapped to SARS-CoV-2, yielding 276 reads with an average size of 3,700 bp. In contrast to NASCarD, the average size of both the human and Lambda genomes were 4,561 bp and 18,216 bp, respectively. **B)** Ratio of bases over the total amount of bases sequenced in each experiment. "No decision" and "Rejected" reads were merged into a single category named "Non-Enriched". **C)** Comparison of mean maximum coverage for SARS-CoV-2 genome with NASCarD (109.7x; black line) and control (34.2x; grey line) after 18 hours sequencing. **D)** SARS-CoV-2 genome sequence quality (100-N%) over time with NASCarD and control sequencing, where N% represents the percentage of positions with a sequencing depth below 20x. The time when genome completeness reached >99% is indicated for NASCarD (black arrow), and the control flow cell (grey arrow).

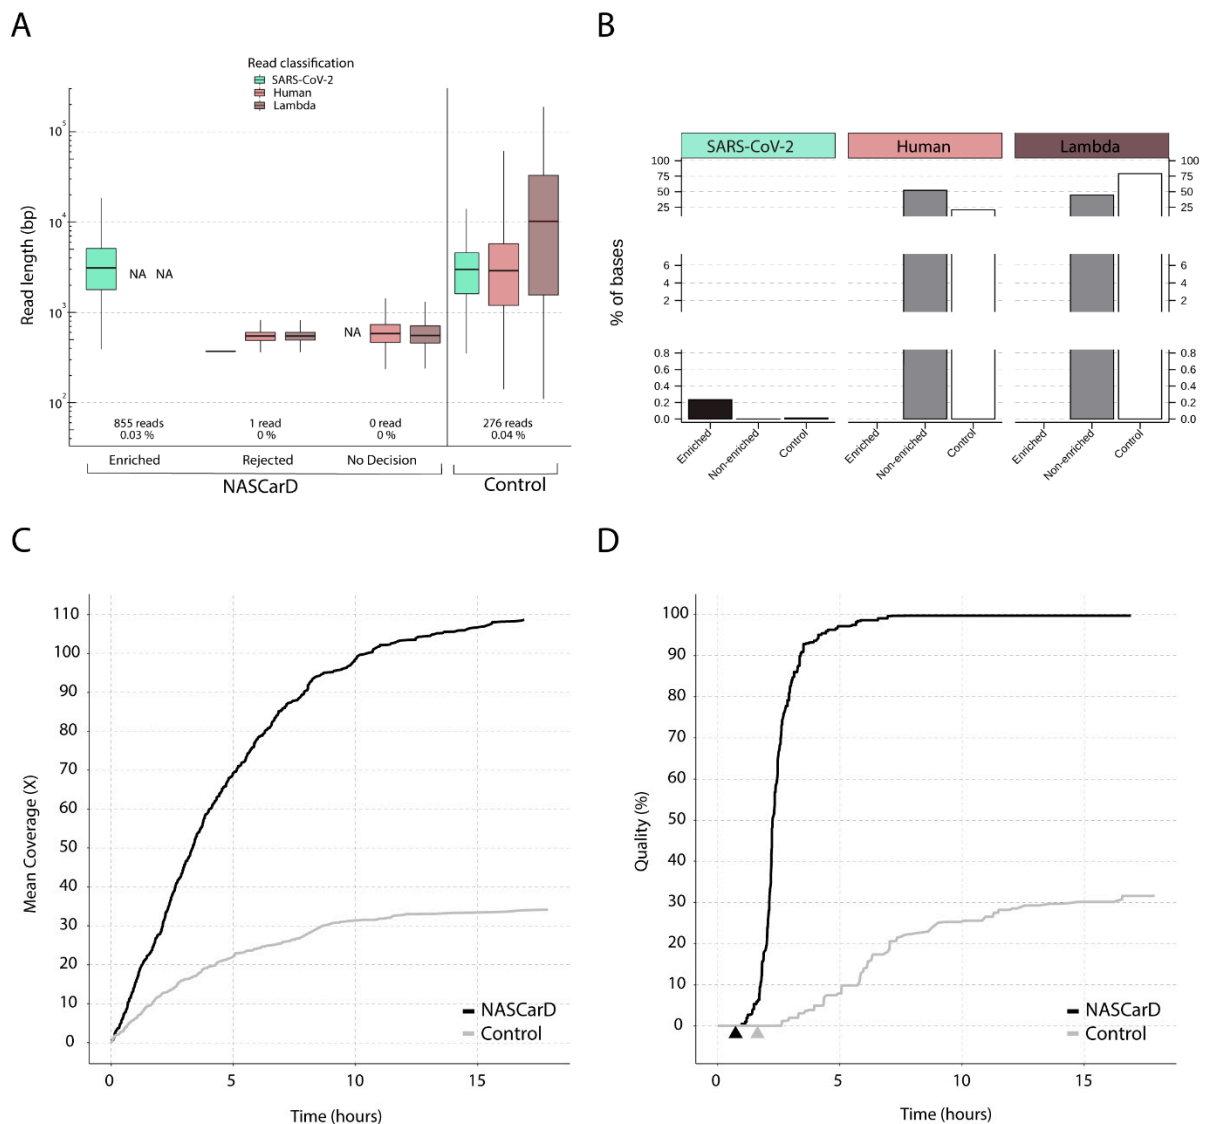

**Figure S2. Genome coverage comparison of SARS-CoV-2 for experiments M, P, V, N, H, and I using NASCarD. Genome completeness (%) is indicated in each panel.**

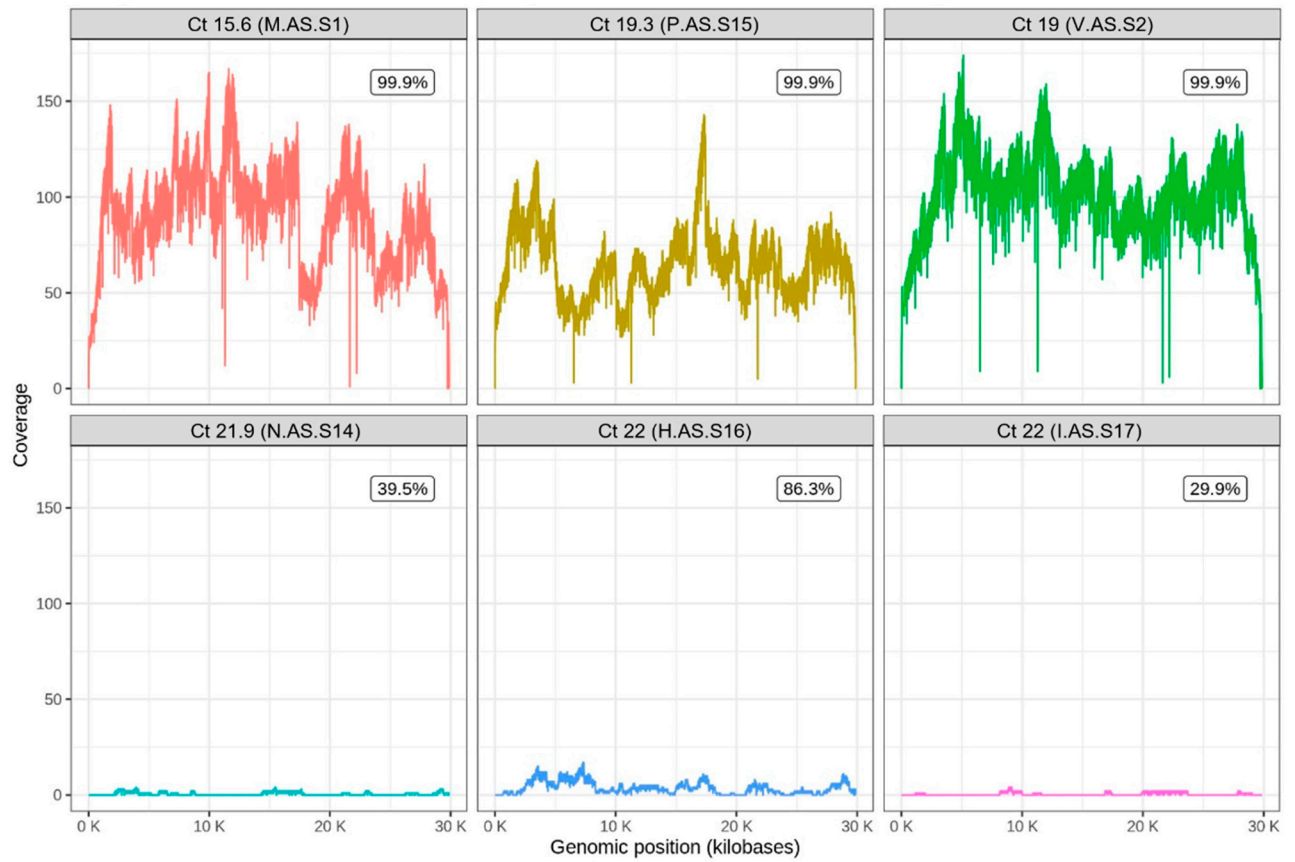

**Figure S3. Genome coverage of 12 samples with different Ct values multiplexed in the same experiment using NASCarD.** The first sample (J.AS:S1) with Ct 15.6 was also sequenced in experiment M (Figure S2). Genome completeness (%) is indicated in each panel.

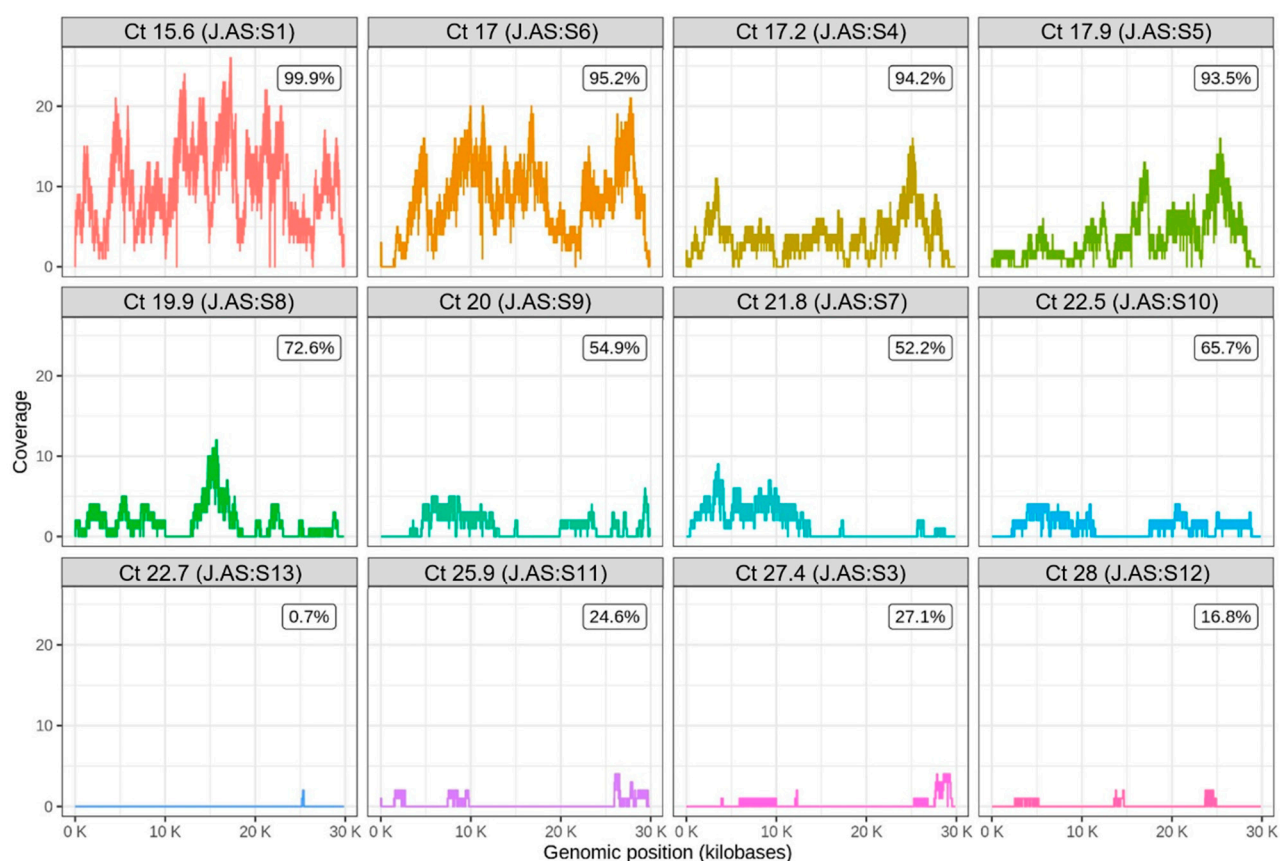

**Table S1. Overview of experiments involving NASCarD and control sequencing experiments, including experimental setup, sample identification, and the number of reads per sample.**

| Experiment setup        |                                |                      |                  | Original samples |      |           |                  |                               | NASCarD (and control) |              |             |                |                      |                                                              |                               |
|-------------------------|--------------------------------|----------------------|------------------|------------------|------|-----------|------------------|-------------------------------|-----------------------|--------------|-------------|----------------|----------------------|--------------------------------------------------------------|-------------------------------|
| Experiment <sup>a</sup> | Sequencing method <sup>b</sup> | Sample Experiment ID | Run duration (h) | ID               | Ct   | Lineage   | GISAID ID        | Number of ambiguous bases (%) | Total reads           | Lambda reads | Human reads | Unmapped reads | SARS-CoV-2 (% total) | SARS-CoV-2 Mean read length $\pm$ standard deviation (bases) | Completeness (%) <sup>d</sup> |
| M                       | AS                             | M.AS.S1              | 72               | S1               | 15.6 | BA.2      | EPI_ISL_10879533 | 1110 (3.7)                    | 715,685               | 674,483      | 39,437      | 512            | 1,253 (0.1751)       | 2,461.8 $\pm$ 2092.0                                         | 99.9                          |
| M                       | C                              | M.C.S1               | 72               | S1               | 15.6 | BA.2      | EPI_ISL_10879533 | 1110 (3.7)                    | 454,012               | 430,333      | 22,624      | 310            | 745 (0.1641)         | 2,383.6 $\pm$ 2583.1                                         | 99.9                          |
| V                       | AS                             | V.AS.S2              | 19               | S2               | 19.0 | BA.2      | EPI_ISL_13251070 | 197 (0.7)                     | 2,989,153             | 1,163,665    | 1,384,307   | 440,311        | 870 (0.0291)         | 3,833.6 $\pm$ 2757.3                                         | 99.9                          |
| V                       | C                              | V.C.S2               | 19               | S2               | 19.0 | BA.2      | EPI_ISL_13251070 | 197 (0.7)                     | 736,061               | 320,678      | 337,429     | 77,678         | 276 (0.0375)         | 3,700.0 $\pm$ 5914.1                                         | 99.9                          |
| J                       | AS                             | J.AS.S3              | 19               | S3               | 27.4 | BA.1      | EPI_ISL_10879502 | 3741 (12.5)                   | 1,296,256             | 113,714      | 12,700      | 212            | 9 (0.0007)           | 1,978.3 $\pm$ 1847.8                                         | 27.1                          |
| J                       | AS                             | J.AS.S4              | 19               | S4               | 17.2 | BA.2      | EPI_ISL_10879503 | 1110 (3.7)                    | 1,296,256             | 136,800      | 18,555      | 367            | 52 (0.0040)          | 2,929.2 $\pm$ 1875.4                                         | 94.2                          |
| J                       | AS                             | J.AS.S5              | 19               | S5               | 17.9 | BA.2      | EPI_ISL_10879508 | 1111 (3.7)                    | 1,296,256             | 84,884       | 15,396      | 167            | 44 (0.0034)          | 3,222.7 $\pm$ 2163.8                                         | 93.5                          |
| J                       | AS                             | J.AS.S6              | 19               | S6               | 17.0 | BA.2      | EPI_ISL_10879509 | 1110 (3.7)                    | 1,296,256             | 88,522       | 13,763      | 102            | 99 (0.0076)          | 3,136.3 $\pm$ 2455.7                                         | 95.2                          |
| J                       | AS                             | J.AS.S7              | 19               | S7               | 21.8 | BA.1      | EPI_ISL_10879510 | 190 (0.6)                     | 1,296,256             | 84,776       | 6,713       | 90             | 16 (0.0012)          | 3,830.3 $\pm$ 3634.5                                         | 52.2                          |
| J                       | AS                             | J.AS.S8              | 19               | S8               | 19.9 | BA.1.1    | EPI_ISL_10879512 | 189 (0.6)                     | 1,296,256             | 96,282       | 37,417      | 155            | 29 (0.0022)          | 3,027.2 $\pm$ 2578.2                                         | 72.6                          |
| J                       | AS                             | J.AS.S9              | 19               | S9               | 20.0 | BA.2      | EPI_ISL_10879518 | 1198 (4.0)                    | 1,296,256             | 74,338       | 52,737      | 157            | 26 (0.0020)          | 1,808.6 $\pm$ 2079.7                                         | 54.9                          |
| J                       | AS                             | J.AS.S10             | 19               | S10              | 22.5 | BA.1.1    | EPI_ISL_10879520 | 237(0.8)                      | 1,296,256             | 93,880       | 6,382       | 106            | 12 (0.0009)          | 3,860.2 $\pm$ 2824.6                                         | 65.7                          |
| J                       | AS                             | J.AS.S11             | 19               | S11              | 25.9 | BA.1      | EPI_ISL_10879522 | 2991 (10.0)                   | 1,296,256             | 81,315       | 14,008      | 183            | 7 (0.0005)           | 2,077.3 $\pm$ 1238.8                                         | 24.6                          |
| J                       | AS                             | J.AS.S12             | 19               | S12              | 28.0 | BA.2      | EPI_ISL_10879527 | 1111 (3.7)                    | 1,296,256             | 72,601       | 9,758       | 88             | 4 (0.0003)           | 1,664.5 $\pm$ 950.1                                          | 16.8                          |
| J                       | AS                             | J.AS.S1              | 19               | S1               | 15.6 | BA.2      | EPI_ISL_10879533 | 5678 (19.0)                   | 1,296,256             | 102,352      | 12,725      | 138            | 207 (0.0160)         | 1,941.0 $\pm$ 1652.3                                         | 99.9                          |
| J                       | AS                             | J.AS.S13             | 19               | S13              | 22.7 | BA.1.1    | EPI_ISL_10879538 | 190 (0.6)                     | 1,296,256             | 52,218       | 12,038      | 111            | 1 (0.0001)           | 456.0 $\pm$ 0                                                | 0.7                           |
| N                       | AS                             | N.AS.S14             | 72               | S14              | 21.9 | XM        | EPI_ISL_12490028 | 1111 (3.7)                    | 485,087               | 471,740      | 12,943      | 390            | 14 (0.0029)          | 1,448.1 $\pm$ 1216.9                                         | 39.5                          |
| N                       | C                              | N.C.S14              | 72               | S14              | 21.9 | XM        | EPI_ISL_12490028 | 1111 (3.7)                    | 320,728               | 312,023      | 8,387       | 308            | 10 (0.0031)          | 2,386.5 $\pm$ 2082.8                                         | 37.3                          |
| P <sup>c</sup>          | AS                             | P.AS.S15             | 21               | S15              | 19.3 | B.1.1.529 | EPI_ISL_7062525  | 1809 (6.0)                    | 1,375,980             | 1,300,753    | 74,532      | NA             | 695 (0.0505)         | 3,051.5 $\pm$ 2408.4                                         | 99.9                          |
| P <sup>c</sup>          | C                              | P.C.S15              | 21               | S15              | 19.3 | B.1.1.529 | EPI_ISL_7062525  | 1809 (6.0)                    | 432,020               | 395,298      | 33,388      | 3155           | 179 (0.0414)         | 3,051.5 $\pm$ 2408.4                                         | 99.9                          |
| H                       | AS                             | H.AS.S16             | 8                | S16              | 22.0 | BA.2      | EPI_ISL_13611368 | 1412 (4.7)                    | 1,229,001             | 853,063      | 372,308     | 3,561          | 69 (0.0056)          | 2,022.8 $\pm$ 1292.7                                         | 86.3                          |
| I                       | AS                             | I.AS.S17             | 8                | S17              | 24.0 | BA.4      | EPI_ISL_13611359 | 1150 (3.8)                    | 1,199,852             | 966,079      | 213,976     | 19,790         | 7 (0.0006)           | 2,135.6 $\pm$ 2290.4                                         | 29.9                          |
| O                       | AS                             | O.AS.S18             | 17.4             | S18              | 17.2 | BA.1.1    | EPI_ISL_11825556 | 201 (0.7)                     | 611,138               | 131,804      | 25,896      | 422            | 11 (0.0018)          | 2,919.8 $\pm$ 2358.0                                         | 39.7                          |
| O                       | AS                             | O.AS.S19             | 17.4             | S19              | 26.1 | BA.1.1    | EPI_ISL_11825569 | 313 (1.0)                     | 611,138               | 102,161      | 754         | 71             | 3 (0.0005)           | 1,358.5 $\pm$ 726.2                                          | 5.0                           |
| O                       | AS                             | O.AS.S20             | 17.4             | S20              | 20.1 | BA.1.1    | EPI_ISL_11825577 | 189 (0.6)                     | 611,138               | 96,853       | 9,221       | 61             | 5 (0.0008)           | 1,895.4 $\pm$ 894.0                                          | 16.4                          |
| O                       | AS                             | O.AS.S21             | 17.4             | S21              | 23.0 | BA.1.1    | EPI_ISL_11825599 | 190 (0.6)                     | 611,138               | 101,600      | 1,640       | 49             | 3 (0.0005)           | 2,645.7 $\pm$ 2698.0                                         | 14.7                          |
| O                       | AS                             | O.AS.S22             | 17.4             | S22              | 15.7 | AY.4      | EPI_ISL_6012191  | 416 (1.4)                     | 611,138               | 115,243      | 24,863      | 231            | 247 (0.0404)         | 2,428.7 $\pm$ 1873.8                                         | 99.9                          |

<sup>a</sup> Experiments J and O consisted of multiplex runs, while all other experiments were performed as one sample per flow cell. Sample S1 was used in both experiments M and J.

<sup>b</sup> "AS" refers to Adaptive sampling, while "C" refers to Control (without AS) sequencing mode. For each of those experiments, the same prepared library was split and run under either AS or C sequencing mode.

<sup>c</sup> Experiment P was conducted using a single flow cell, which was divided into two groups of 256 sequencing channels eac, with one group assigned to AS, while the other to C sequencing mode.

<sup>d</sup> SARS-CoV-2 genome completeness is defined as the percentage of the corresponding genome sequence produced by amplicon-based sequencing.

**Table S2. Overview of NASCarD and Control sequencing experiments, including sample identification, number of bases per sample, and quality control analysis.** The column "Sample Experiment ID" follows the same order as in Table S1.

| Experiment | Sample Experiment ID | Sequencing results: number of bases (%) |                      |                      |                             | Quality Control Analysis      |                              |                   |
|------------|----------------------|-----------------------------------------|----------------------|----------------------|-----------------------------|-------------------------------|------------------------------|-------------------|
|            |                      | Total                                   | Lambda (%)           | Human (%)            | SARS-CoV-2 <sup>a</sup> (%) | Completeness (%) <sup>b</sup> | GCS quality (%) <sup>c</sup> | Mean coverage (x) |
| M          | M.AS.S1              | 450,616,192                             | 407,875,939 (90.6)   | 19,112,971 (4.2)     | 2,953,936 (0.656)           | 99.9                          | 99.4                         | 98.6              |
| M          | M.C.S1               | 3,915,294,178                           | 3,850,251,194 (98.3) | 63,267,196 (1.6)     | 1,775,788 (0.045)           | 99.9                          | 97                           | 59.4              |
| V          | V.AS.S2              | 1,402,316,318                           | 625,302,769 (44.5)   | 733,628,965 (52.4)   | 3,278,109 (0.234)           | 99.9                          | 99.7                         | 109.7             |
| V          | V.C.S2               | 7,381,824,702                           | 5,841,536,795 (79.1) | 1,539,266,720 (20.9) | 1,021,187 (0.014)           | 99.9                          | 31.6                         | 34.1              |
| J          | J.AS.S3              | 70,204,064                              | 61,278,186 (87.3)    | 4,897,351 (7.0)      | 15,826 (0.023)              | 27.1                          | 0                            | 0.5               |
| J          | J.AS.S4              | 86,492,804                              | 73,255,370 (84.7)    | 8,722,668 (10.1)     | 140,601 (0.163)             | 94.2                          | 0                            | 4.7               |
| J          | J.AS.S5              | 55,090,197                              | 45,701,283 (83.0)    | 5,486,054 (10.0)     | 138,578 (0.252)             | 93.5                          | 0                            | 4.6               |
| J          | J.AS.S6              | 56,190,820                              | 47,587,535 (84.7)    | 4,350,117 (7.7)      | 304,218 (0.541)             | 95.2                          | 0                            | 10.2              |
| J          | J.AS.S7              | 51,249,342                              | 45,750,332 (89.3)    | 3,137,910 (6.1)      | 57,455 (0.112)              | 52.2                          | 0                            | 1.9               |
| J          | J.AS.S8              | 71,017,736                              | 51,889,267 (73.1)    | 11,797,306 (16.6)    | 70,025 (0.099)              | 72.6                          | 0                            | 2.3               |
| J          | J.AS.S9              | 65,986,135                              | 40,003,674 (60.6)    | 18,438,397 (27.9)    | 45,214 (0.069)              | 54.9                          | 0                            | 1.5               |
| J          | J.AS.S10             | 56,086,890                              | 50,530,696 (90.1)    | 2,827,148 (5.0)      | 46,322 (0.083)              | 65.7                          | 0                            | 1.5               |
| J          | J.AS.S11             | 53,291,074                              | 43,911,405 (82.4)    | 6,886,918 (12.9)     | 14,541 (0.027)              | 24.6                          | 0                            | 0.5               |
| J          | J.AS.S12             | 45,321,710                              | 38,754,328 (85.5)    | 3,810,409 (8.4)      | 6,658 (0.014)               | 16.8                          | 0                            | 0.2               |
| J          | J.AS.S1              | 64,216,927                              | 55,029,456 (85.7)    | 5,052,616 (7.8)      | 367,774 (0.573)             | 99.9                          | 0                            | 12.3              |
| J          | J.AS.S13             | 35,584,519                              | 28,234,866 (79.4)    | 5,039,384 (14.2)     | 456 (0.001)                 | 0.7                           | 0                            | 0                 |
| N          | N.AS.S14             | 316,118,103                             | 309,267,429 (97.9)   | 6,830,401 (2.2)      | 20,273 (0.006)              | 39.5                          | 0                            | 0.6               |
| N          | N.C.S14              | 2,561,553,649                           | 2,541,397,162 (99.2) | 20,132,622 (0.8)     | 23,865 (0.001)              | 37.3                          | 0                            | 0.8               |
| P          | P.AS.S15             | 627,991,282                             | 592,896,076 (12.9)   | 32,979,835 (0.7)     | 2,115,371 (0.050)           | 99.9                          | 99.7                         | 70.8              |
| P          | P.C.S15              | 3,940,498,582                           | 3,908,693,884 (85.6) | 31,327,755 (0.7)     | 476,943 (0.010)             | 99.9                          | 0.2                          | 16                |
| H          | H.AS.S16             | 619,053,675                             | 428,361,003 (69.2)   | 190,559,381 (30.8)   | 133,291 (0.021)             | 86.3                          | 0                            | 4.4               |
| I          | I.AS.S17             | 577,770,821                             | 471,693,149 (81.6)   | 106,062,723 (18.3)   | 14,949 (0.003)              | 29.9                          | 0                            | 0.5               |
| O          | O.AS.S18             | 88,675,236                              | 71,619,856 (80.8)    | 13,282,587 (15.0)    | 29,198 (0.033)              | 39.7                          | 0                            | 1                 |
| O          | O.AS.S19             | 58,102,860                              | 55,261,339 (95.1)    | 371,384 (0.6)        | 2,717 (0.005)               | 5.0                           | 0                            | 0                 |
| O          | O.AS.S20             | 58,943,920                              | 52,650,459 (89.3)    | 3,214,698 (5.5)      | 9,477 (0.016)               | 16.4                          | 0                            | 0.3               |
| O          | O.AS.S21             | 58,241,506                              | 55,206,008 (94.8)    | 792,680 (1.4)        | 7,937 (0.014)               | 14.7                          | 0                            | 0.2               |
| O          | O.AS.S22             | 79,749,304                              | 62,498,649 (78.4)    | 13,420,395 (16.8)    | 574,431 (0.720)             | 99.9                          | 3.8                          | 19.1              |

<sup>a</sup> The number of bases for SARS-CoV-2 AS represents the sum of "enriched" (mostly "stop receiving" and few from "unblock" and "no decision" groups). The "unknown" group was not considered in the sum and was discarded for all samples.

<sup>b</sup> SARS-CoV-2 genome completeness is defined as the percentage of the corresponding genome sequence produced by amplicon-based sequencing.

<sup>c</sup> We defined "genome quality" as (100-N%), where N% represents the percentage of positions with a sequencing depth below 20x.

**Table S3. Sequencing costs and laboratory hands-on time.**

| <b>Sequencing method<sup>a</sup></b> | <b>Cost per sample<br/>(Swiss Francs)</b> | <b>Library preparation<br/>time</b> | <b>Sequencing<br/>time<sup>b</sup></b> | <b>Turnaround<br/>time</b> |
|--------------------------------------|-------------------------------------------|-------------------------------------|----------------------------------------|----------------------------|
| Standard                             | 1,040                                     | 3 h                                 | 10 h                                   | 13 h                       |
| Standard (12 samples<br>multiplexed) | 251                                       | 3.5 h                               | >18 h                                  | >22 h                      |
| NASCarD                              | 1,040                                     | 3 h                                 | 7 h                                    | 10 h                       |
| NASCarD (12 samples<br>multiplexed)  | 251                                       | 3.5 h                               | 7 h                                    | 11 h                       |

<sup>a</sup>Cost estimates are based on Oxford Nanopore Technologies SQK-LSK109 library preparation and further sequencing on R9.4.1 flow cells. <sup>b</sup>Sequencing time to achieve more than 99% completeness per sample.
